# Supplementary material
Source: PubMed Central journal article supplement (PMC9940330)
Supplement: mmc1.pdf [file mmc1.pdf]

# THE LANCET

## Rheumatology

### Supplementary appendix

This appendix formed part of the original submission and has been peer reviewed. We post it as supplied by the authors.

Supplement to: Qian G, Wang X, Patel NJ, et al. Outcomes with and without outpatient SARS-CoV-2 treatment for patients with COVID-19 and systemic autoimmune rheumatic diseases: a retrospective cohort study. *Lancet Rheumatol* 2023; published online Jan 23. [https://doi.org/10.1016/S2665-9913\(23\)00006-1](https://doi.org/10.1016/S2665-9913(23)00006-1).

## Outcomes with and without outpatient SARS-CoV-2 treatment for patients with COVID-19 and systemic autoimmune rheumatic diseases: A retrospective cohort study

### Supplemental material:

**Supplemental Table S1.** Rheumatic disease terms used to identify patients with systemic rheumatic disease and their associated ICD-10 codes.

**Supplemental Table S2.** Immunomodulatory medications used to identify patients with systemic rheumatic disease.

**Supplemental Figure S1.** Directed acyclic graph depicting exposure variable, confounding variables, and primary outcome.

**Supplemental Table S3.** Baseline characteristics for SARD patients at COVID-19 onset among molnupiravir, outpatient remdesivir, or combination users.

**Supplemental Table S4.** Rate ratios for severe COVID-19 (hospitalization or death) by outpatient SARS-CoV-2 treatment status (alternative analysis to guard against possible sparse-data bias).

**Supplemental Table S5.** Rate ratios for severe COVID-19 (hospitalization or death) of subgroups with original point estimates of ORs  $\leq 0.10$  (alternative analysis to guard against possible sparse-data bias).

**Supplemental Table S6.** Odds ratios for severe COVID-19 (hospitalization or death) by outpatient SARS-CoV-2 treatment status among subgroups of patients with rheumatoid arthritis, methotrexate users, and hydroxychloroquine users.

**Supplemental Table S7.** Severe COVID-19 outcomes by outpatient treatment among SARD patients (n=704), only considering outcomes that occur at least one day after initial positive SARS-CoV-2 test.

**Supplemental Table S8.** Odds ratios for severe COVID-19 (hospitalization or death) by outpatient treatment status, only considering outcomes that occur at least one day after initial positive SARS-CoV-2 test.

**Supplemental Table S9.** Severe COVID-19 outcomes by outpatient treatment among SARD patients (n=704), only considering outcomes that occur at least one day after initial positive SARS-CoV-2 test to day 14.

**Supplemental Table S10.** Odds ratios for severe COVID-19 (hospitalization or death) by outpatient treatment status, only considering outcomes that occur at least one day after initial positive SARS-CoV-2 test to day 14.

**Supplemental Table S11.** Severe COVID-19 outcomes by outpatient treatment among SARD patients (n=704), eliminating outcomes adjudicated to be unrelated to COVID-19.

**Supplemental Table S12.** Odds ratios for severe COVID-19 (hospitalization or death) by outpatient treatment status, eliminating outcomes adjudicated to be unrelated to COVID-19.

**Supplemental Table S13.** Baseline characteristics stratified by COVID-19 rebound among users of nirmatrelvir/ritonavir (n=311).

**Supplemental Table S1.** Rheumatic disease terms used to identify patients with systemic rheumatic disease and their associated ICD-10 codes.

| Category                           | Rheumatic Disease (ICD-10 codes)                                                                                                                                                                                                                                                                                                                                                                                                                                                                                               |
|------------------------------------|--------------------------------------------------------------------------------------------------------------------------------------------------------------------------------------------------------------------------------------------------------------------------------------------------------------------------------------------------------------------------------------------------------------------------------------------------------------------------------------------------------------------------------|
| Inflammatory arthritis             | <ul style="list-style-type: none"> <li>● Rheumatoid arthritis (M05%, M06%)</li> <li>● Inflammatory arthritis or inflammatory polyarthropathy (M06.4)</li> <li>● Juvenile idiopathic arthritis (M08.20)</li> <li>● Psoriatic arthritis or arthropathic psoriasis (L40.50)</li> <li>● Ankylosing spondylitis (M45.9)</li> </ul>                                                                                                                                                                                                  |
| Vasculitis                         | <ul style="list-style-type: none"> <li>● Anti-neutrophil cytoplasmic antibody-associated vasculitis: granulomatosis with polyangiitis, eosinophilic granulomatosis with polyangiitis, microscopic polyangiitis (M31.3, M31.7, M30.0)</li> <li>● Kawasaki disease (M30.3)</li> <li>● Takayasu arteritis (M31.4)</li> <li>● Polyarteritis nodosa (M30.0)</li> <li>● Giant cell arteritis (M31.6)</li> <li>● Polymyalgia rheumatica (M35.3)</li> <li>● Behçet disease (M35.2)</li> <li>● Unspecified arteritis (I77.6)</li> </ul> |
| Other Systemic Autoimmune Diseases | <ul style="list-style-type: none"> <li>● Systemic lupus erythematosus (M32%)</li> <li>● Sjogren's syndrome (M35.0)</li> <li>● Idiopathic inflammatory myositis: dermatomyositis, polymyositis, statin-associated autoimmune myositis, unspecified myositis (G72.49, G72.41, M33)</li> <li>● Systemic sclerosis (M34.0, M34.1, M34.8%, M34.9)</li> <li>● Mixed connective tissue disease (M35.1)</li> <li>● Antiphospholipid syndrome (D68.61)</li> </ul>                                                                       |

ICD = international classification of disease, 10<sup>th</sup> revision codes. % indicates a wild character to capture all instances of a given code.

**Supplemental Table S2.** Immunomodulatory medications used to identify patients with systemic rheumatic disease.

| Category and generic name                | Brand name(s)                                                                       | Mechanism of action (for targeted therapy) | Route        | CPT code if intravenous                              |
|------------------------------------------|-------------------------------------------------------------------------------------|--------------------------------------------|--------------|------------------------------------------------------|
| <b>Glucocorticoids</b>                   |                                                                                     |                                            |              |                                                      |
| Prednisone (minimum of 30 pills)         | Deltasone<br>Prednicot<br>Prednisone Intensol<br>Rayos<br>Sterapred<br>Sterapred DS |                                            | Oral         |                                                      |
| Methylprednisolone (minimum of 30 pills) | Medrol                                                                              |                                            | Oral         |                                                      |
| <b>Conventional Synthetic DMARDs</b>     |                                                                                     |                                            |              |                                                      |
| Azathioprine                             | Imuran                                                                              |                                            | Oral         |                                                      |
| Methotrexate                             | Azasan<br>Otrexup<br>Rasuvo<br>Rheumatrex<br>Trexall                                |                                            | Oral or subQ |                                                      |
| Leflunomide                              | Arava                                                                               |                                            | Oral         |                                                      |
| Mycophenolic acid                        | CellCept                                                                            |                                            | Oral         |                                                      |
| Mycophenolate mofetil                    | Myfortic                                                                            |                                            | Oral         |                                                      |
| Sulfasalazine                            | Azulfidine                                                                          |                                            | Oral         |                                                      |
| Hydroxychloroquine                       | Plaquenil                                                                           |                                            | Oral         |                                                      |
| Chloroquine                              | Aralen                                                                              |                                            | Oral         |                                                      |
| <b>Targeted Synthetic DMARDs</b>         |                                                                                     |                                            |              |                                                      |
| Tofacitinib                              | Xeljanz                                                                             | JAK inhibitor                              | Oral         |                                                      |
| Baricitinib                              | Olumiant                                                                            | JAK inhibitor                              | Oral         |                                                      |
| Upadacitinib                             | Rinvoq                                                                              | JAK inhibitor                              | Oral         |                                                      |
| <b>Biologic DMARDs</b>                   |                                                                                     |                                            |              |                                                      |
| Rituximab                                | Rituxan<br>Truxima<br>Ruxience                                                      | Anti-CD20 monoclonal antibody              | IV           | J9310<br>Q5115<br>Q5119                              |
| Ocrelizumab                              | Ocrevus                                                                             | Anti-CD20 monoclonal antibody              | IV           | J2350                                                |
| Abatacept                                | Orencia                                                                             | CTLA-4 Ig                                  | subQ or IV   | J0129                                                |
| Infliximab                               | Remicade<br>Inflectra<br>Renflexis<br>Avsola                                        | TNF inhibitor                              | IV           | J1745<br>Q5103<br>Q5104<br>Q5121                     |
| Etanercept                               | Enbrel                                                                              | TNF inhibitor                              | subQ         |                                                      |
| Adalimumab                               | Humira                                                                              | TNF inhibitor                              | subQ         |                                                      |
| Certolizumab                             | Cimzia                                                                              | TNF inhibitor                              | subQ or IV   | J0717                                                |
| Golimumab                                | Simponi                                                                             | TNF inhibitor                              | subQ or IV   | J1602                                                |
| Anakinra                                 | Kineret                                                                             | IL-1 inhibitor                             | subQ or IV   | n/a (coded under "other biologic" J3490 or J3590 but |

|                  |                                            |                    |               |       |                                     |
|------------------|--------------------------------------------|--------------------|---------------|-------|-------------------------------------|
| Canakinumab      | Ilaris                                     | IL-1 inhibitor     | subQ<br>or IV | J0638 | doesn't seem<br>to have its<br>own) |
| Mepolizumab      | Nucala                                     | IL-5 inhibitor     | subQ<br>or IV | J2182 |                                     |
| Benralizumab     | Fasenra                                    | IL-5 inhibitor     | subQ<br>or IV | J0517 |                                     |
| Tocilizumab      | Actemra                                    | IL-6 inhibitor     | subQ<br>or IV | J3262 |                                     |
| Sarilumab        | Kevzara                                    | IL-6 inhibitor     | subQ          |       |                                     |
| Secukinumab      | Cosentyx                                   | IL-17A inhibitor   | subQ          |       |                                     |
| Ixekizumab       | Taltz                                      | IL-17A inhibitor   | subQ          |       |                                     |
| Ustekinumab      | Stelara                                    | IL-12/23 inhibitor | subQ<br>or IV | J3358 |                                     |
| Guselkumab       | Tremfya                                    | IL-23 inhibitor    | subQ          |       |                                     |
| Belimumab        | Benlysta                                   | BLyS inhibitor     | subQ<br>or IV | J0490 |                                     |
| Eculizumab       | Soliris                                    | C5 inhibitor       | IV            | J1300 |                                     |
| <b>Other</b>     |                                            |                    |               |       |                                     |
| Tacrolimus       | Prograf<br>Envarsus<br>Astagraf<br>Hecoria |                    | Oral or<br>IV | J7525 |                                     |
| Cyclosporine     | Gengraf<br>Neoral<br>Sandimmune            |                    | Oral or<br>IV | J7516 |                                     |
| Apremilast       | Otezla                                     | PDE4 inhibitor     | Oral          |       |                                     |
| Cyclophosphamide | Cytoxan                                    |                    | Oral or<br>IV | J9070 |                                     |

---

CPT, Current Procedural Terminology; CTLA-4, cytotoxic T-lymphocyte-associated protein 4; DMARD, disease-modifying anti-rheumatic drug; IL, interleukin; JAK, Janus kinase; PDE, phosphodiesterase; TNF, tumor necrosis factor

**Supplemental Figure S1.** Directed acyclic graph depicting exposure variable, confounding variables, and primary outcome. Note that there were too few unvaccinated patients to include as a covariate in multivariable models. eGFR, estimated glomerular filtration rate; COVID-19, coronavirus disease 2019; SES, socioeconomic status.

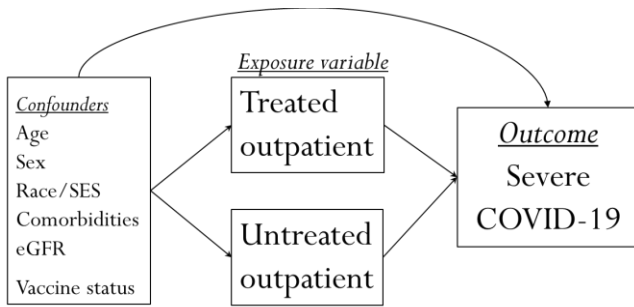

**Supplemental Table S3.** Baseline characteristics for SARD patients at COVID-19 onset among molnupiravir, outpatient remdesivir, or combination users.

| Characteristic                                                | Molnupiravir use (n=5) | Outpatient remdesivir use (n=3) | Combination use (n=6) |
|---------------------------------------------------------------|------------------------|---------------------------------|-----------------------|
| <b>Demographics</b>                                           |                        |                                 |                       |
| Age (mean, SD, years)                                         | 68.26 (9.7)            | 65.78 (17.4)                    | 55.78 (6.8)           |
| Female                                                        | 4 (80.0%)              | 3 (100.0%)                      | 6 (100.0%)            |
| Race                                                          |                        |                                 |                       |
| White                                                         | 5 (100.0%)             | 3 (100.0%)                      | 5 (83.3%)             |
| Black or African American                                     | 0 (0.0%)               | 0 (0.0%)                        | 0 (0.0%)              |
| Asian                                                         | 0 (0.0%)               | 0 (0.0%)                        | 1 (16.7%)             |
| Hispanic or Latinx ethnicity                                  | 0 (0.0%)               | 0 (0.0%)                        | 0 (0.0%)              |
| <b>Lifestyle</b>                                              |                        |                                 |                       |
| Body mass index (mean, SD, kg/m <sup>2</sup> )                | 30.00 (6.2)            | 30.14 (7.2)                     | 33.51 (13.8)          |
| Smoking status                                                |                        |                                 |                       |
| Never                                                         | 2 (40.0%)              | 2 (66.7%)                       | 4 (66.7%)             |
| Past                                                          | 3 (60.0%)              | 1 (33.3%)                       | 2 (33.3%)             |
| Current                                                       | 0 (0.0%)               | 0 (0.0%)                        | 0 (0.0%)              |
| <b>Comorbidities</b>                                          |                        |                                 |                       |
| Charlson Comorbidity Index categories                         |                        |                                 |                       |
| 0                                                             | 1 (20.0%)              | 0 (0.0%)                        | 0 (0.0%)              |
| 1                                                             | 1 (20.0%)              | 1 (33.3%)                       | 2 (33.3%)             |
| 2                                                             | 1 (20.0%)              | 0 (0.0%)                        | 1 (16.7%)             |
| ≥3                                                            | 2 (40.0%)              | 2 (66.7%)                       | 3 (50.0%)             |
| Individual comorbidities                                      |                        |                                 |                       |
| Hypertension                                                  | 3 (60.0%)              | 2 (66.7%)                       | 2 (33.3%)             |
| Diabetes                                                      | 1 (20.0%)              | 2 (66.7%)                       | 2 (33.3%)             |
| Coronary artery disease                                       | 2 (40.0%)              | 0 (0.0%)                        | 2 (33.3%)             |
| Heart failure                                                 | 2 (40.0%)              | 1 (33.3%)                       | 0 (0.0%)              |
| Asthma                                                        | 0 (0.0%)               | 1 (33.3%)                       | 2 (33.3%)             |
| Chronic obstructive pulmonary disease                         | 1 (20.0%)              | 0 (0.0%)                        | 0 (0.0%)              |
| Obstructive sleep apnea                                       | 0 (0.0%)               | 2 (66.7%)                       | 2 (33.3%)             |
| Chronic kidney disease                                        | 0 (0.0%)               | 1 (33.3%)                       | 2 (33.3%)             |
| Malignancy excluding non-melanoma skin cancer                 | 1 (20.0%)              | 0 (0.0%)                        | 1 (16.7%)             |
| Interstitial lung disease                                     | 0 (0.0%)               | 0 (0.0%)                        | 0 (0.0%)              |
| <b>Rheumatic disease diagnosis</b>                            |                        |                                 |                       |
| Rheumatoid arthritis                                          | 1 (20.0%)              | 0 (0.0%)                        | 3 (50.0%)             |
| Psoriatic arthritis                                           | 1 (20.0%)              | 0 (0.0%)                        | 0 (0.0%)              |
| Giant cell arteritis and/or polymyalgia rheumatica            | 0 (0.0%)               | 1 (33.3%)                       | 0 (0.0%)              |
| Systemic lupus erythematosus                                  | 1 (20.0%)              | 1 (33.3%)                       | 2 (33.3%)             |
| ANCA-associated vasculitis and other miscellaneous vasculitis | 0 (0.0%)               | 0 (0.0%)                        | 1 (16.7%)             |
| Axial spondyloarthritis                                       | 1 (20.0%)              | 0 (0.0%)                        | 0 (0.0%)              |
| Mixed connective tissue disease                               | 1 (20.0%)              | 0 (0.0%)                        | 0 (0.0%)              |
| <b>Immunomodulatory medications</b>                           |                        |                                 |                       |
| Oral glucocorticoid                                           | 0 (0.0%)               | 0 (0.0%)                        | 0 (0.0%)              |
| Biologic DMARDs                                               |                        |                                 |                       |

|                                         |           |            |            |
|-----------------------------------------|-----------|------------|------------|
| Anti-CD20 monoclonal antibody           | 0 (0.0%)  | 0 (0.0%)   | 3 (50.0%)  |
| TNF inhibitor                           | 3 (60.0%) | 0 (0.0%)   | 0 (0.0%)   |
| IL-6 receptor inhibitor                 | 0 (0.0%)  | 1 (33.3%)  | 1 (16.7%)  |
| Conventional synthetic DMARDs           |           |            |            |
| Hydroxychloroquine                      | 2 (40.0%) | 2 (66.7%)  | 3 (50.0 %) |
| Mycophenolate mofetil/mycophenolic acid | 0 (0.0%)  | 0 (0.0%)   | 1 (16.7%)  |
| Leflunomide                             | 0 (0.0%)  | 0 (0.0%)   | 1 (16.7%)  |
| Azathioprine                            | 0 (0.0%)  | 0 (0.0%)   | 1 (16.7%)  |
| Cyclosporine                            | 1 (20.0%) | 0 (0.0%)   | 0 (0.0%)   |
| Tacrolimus                              | 0 (0.0%)  | 0 (0.0%)   | 1 (16.7%)  |
| <b>Previous COVID-19 immunity</b>       |           |            |            |
| Vaccination status                      |           |            |            |
| Unvaccinated                            | 0 (0.0%)  | 0 (0.0%)   | 0 (0.0%)   |
| Partially vaccinated                    | 0 (0.0%)  | 0 (0.0%)   | 0 (0.0%)   |
| 2 doses mRNA or 1 dose J&J              | 1 (20.0%) | 0 (0.0%)   | 1 (16.7%)  |
| Additional doses                        | 4 (80.0%) | 3 (100.0%) | 5 (83.3%)  |
| Tixagevimab/cilgavimab use              | 0 (0.0%)  | 0 (0.0%)   | 1 (16.7%)  |
| Previous COVID-19 infection             | 0 (0.0%)  | 0 (0.0%)   | 0 (0.0%)   |

COVID-19, coronavirus disease 2019; eGFR, estimated glomerular filtration rate; IQR, interquartile range; SARD, systemic autoimmune rheumatic disease; SD, standard deviation.



**Supplemental Table S4.** Rate ratios for severe COVID-19 (hospitalization or death) by outpatient SARS-CoV-2 treatment status (alternative analysis to guard against possible sparse-data bias).

| Comparisons (reference=second group listed)          | Unadjusted RR (95%CI) | Multivariable model 1* RR (95%CI) | Multivariable model 2* (RR (95%CI) |
|------------------------------------------------------|-----------------------|-----------------------------------|------------------------------------|
| <b>Primary analysis</b>                              |                       |                                   |                                    |
| Any outpatient treatment vs. no outpatient treatment | 0.12 (0.06, 0.24)     | 0.16 (0.08, 0.32)                 | 0.17 (0.08, 0.35)                  |
| <b>Secondary analyses</b>                            |                       |                                   |                                    |
| Nirmatrelvir/ritonavir vs. no outpatient treatment   | 0.07 (0.03, 0.20)     | 0.11 (0.04, 0.29)                 | 0.11 (0.04, 0.32)                  |
| Monoclonal antibodies vs. no outpatient treatment    | 0.27 (0.11, 0.66)     | 0.28 (0.12, 0.68)                 | 0.29 (0.12, 0.70)                  |
| Nirmatrelvir/ritonavir vs. all others                | 0.10 (0.04, 0.26)     | 0.14 (0.05, 0.38)                 | 0.15 (0.05, 0.41)                  |
| Monoclonal antibodies vs. all others                 | 0.54 (0.22, 1.31)     | 0.47 (0.20, 1.12)                 | 0.47 (0.20, 1.12)                  |
| Nirmatrelvir/ritonavir vs. monoclonal antibodies     | 0.27 (0.07, 1.00)     | 0.48 (0.12, 1.87)                 | 0.47 (0.14, 1.58)                  |

\*Model 1 was adjusted for continuous age, continuous Charlson Comorbidity Index, continuous estimated glomerular filtration rate, and race.

\*Model 2 was adjusted for the covariates listed in Model 1 and Zip code-level median household income.

CI, confidence interval; COVID-19, coronavirus disease 2019; RR, rate ratio; SARS-CoV-2, severe acute respiratory syndrome coronavirus 2.

**Supplemental Table S5.** Rate ratios for severe COVID-19 (hospitalization or death) of subgroups with original point estimates of ORs ≤0.10 (alternative analysis to guard against possible sparse-data bias).

| Comparisons and subgroup (reference=second group listed)    | Unadjusted RR (95%CI) | Multivariable model 1* RR (95%CI) | Multivariable model 2* (RR (95%CI) |
|-------------------------------------------------------------|-----------------------|-----------------------------------|------------------------------------|
| <b>Any outpatient treatment vs. no outpatient treatment</b> |                       |                                   |                                    |
| Age < 65                                                    | 0.05 (0.01, 0.21)     | 0.06 (0.02, 0.26)                 | 0.07 (0.02, 0.30)                  |
| Vaccination Status: 2 mRNA or 1 J&J                         | 0.13 (0.03, 0.56)     | 0.21 (0.05, 0.85)                 | 0.21 (0.06, 0.72)                  |
| Duration since last vaccine dose: > 6 months                | 0.10 (0.03, 0.33)     | 0.13 (0.04, 0.45)                 | 0.13 (0.04, 0.40)                  |
| <b>Nirmatrelvir/ritonavir vs. no outpatient treatment</b>   |                       |                                   |                                    |
| Age < 65                                                    | 0.07 (0.02, 0.28)     | 0.09 (0.02, 0.37)                 | 0.11 (0.03, 0.44)                  |
| Female                                                      | 0.05 (0.01, 0.20)     | 0.07 (0.02, 0.29)                 | 0.08 (0.02, 0.32)                  |
| CCI ≥ 2                                                     | 0.06 (0.02, 0.25)     | 0.08 (0.02, 0.33)                 | 0.08 (0.02, 0.34)                  |
| eGFR ≥ 30                                                   | 0.08 (0.03, 0.22)     | 0.11 (0.04, 0.29)                 | 0.12 (0.04, 0.32)                  |
| Vaccination Status: 2 mRNA or 1 J&J                         | 0.09 (0.01, 0.66)     | 0.13 (0.02, 0.76)                 | 0.13 (0.03, 0.66)                  |
| Vaccination Status: Additional Doses                        | 0.07 (0.02, 0.24)     | 0.11 (0.03, 0.35)                 | 0.12 (0.04, 0.40)                  |
| Duration since last vaccine dose: > 6 months                | 0.05 (0.01, 0.34)     | 0.06 (0.01, 0.38)                 | 0.06 (0.01, 0.34)                  |

\*Model 1 was adjusted for continuous age, continuous Charlson Comorbidity Index, continuous estimated glomerular filtration rate, and race.

\*Model 2 was adjusted for the covariates listed in Model 1 and Zip code-level median household income.

CI, confidence interval; COVID-19, coronavirus disease 2019; RR, rate ratio; SARS-CoV-2, severe acute respiratory syndrome coronavirus 2.

**Supplemental Table S6.** Odds ratios for severe COVID-19 (hospitalization or death) by outpatient SARS-CoV-2 treatment status among subgroups of patients with rheumatoid arthritis, methotrexate users, and hydroxychloroquine users.

| <b>Comparisons (reference=second group listed)</b>                            | <b>Unadjusted OR for severe COVID-19 (95%CI)</b> | <b>Multivariable* OR for severe COVID-19 (95%CI)</b> |
|-------------------------------------------------------------------------------|--------------------------------------------------|------------------------------------------------------|
| <b>Primary analysis: Any outpatient treatment vs. no outpatient treatment</b> |                                                  |                                                      |
| Subgroup: Rheumatoid arthritis patients (n=347)                               | 0.12 (0.04, 0.35)                                | 0.14 (0.04, 0.44)                                    |
| Subgroup: Methotrexate users (n=232)                                          | 0.08 (0.02, 0.38)                                | 0.13 (0.03, 0.60)                                    |
| Subgroup: Hydroxychloroquine users (n=214)                                    | 0.06 (0.01, 0.43)                                | 0.06 (0.01, 0.48)                                    |

\*Adjusted for continuous age, continuous Charlson Comorbidity Index, continuous estimated glomerular filtration rate, and race.

CI, confidence interval; COVID-19, coronavirus disease 2019; OR, odds ratio; SARS-CoV-2, severe acute respiratory syndrome coronavirus 2.

**Supplemental Table S7.** Severe COVID-19 outcomes by outpatient treatment among SARD patients (n=704), only considering outcomes that occur at least one day after initial positive SARS-CoV-2 test.

| <b>Outcome</b>                             | <b>All Rheumatic Disease Patients with COVID-19 (n=704)</b> | <b>No outpatient treatment (n=278)</b> | <b>Any treatment (n=426)</b> | <b>Nirmatrelvir/ritonavir use (n=307)</b> | <b>Monoclonal antibody use (n=105)</b> |
|--------------------------------------------|-------------------------------------------------------------|----------------------------------------|------------------------------|-------------------------------------------|----------------------------------------|
| Hospitalization                            | 38 (5.4%)                                                   | 29 (10.4%)                             | 9 (2.1%)                     | 4 (1.3%)                                  | 5 (4.8%)                               |
| Death                                      | 3 (0.4%)                                                    | 2 (0.7%)                               | 1 (0.2%)                     | 1 (0.3%)                                  | 0 (0.0%)                               |
| Severe COVID-19 (hospitalization or death) | 39 (5.5%)                                                   | 30 (10.8%)                             | 9 (2.1%)                     | 4 (1.3%)                                  | 5 (4.8%)                               |

\*There were no severe COVID-19 outcomes among molnupiravir (n=5), remdesivir (n=3), or combination (n=6; 4 received nirmatrelvir/ritonavir and monoclonal antibodies and 2 received molnupiravir and monoclonal antibodies) users.

COVID-19, coronavirus disease 2019; SARD, systemic autoimmune rheumatic disease; SARS-CoV-2, severe acute respiratory syndrome coronavirus 2.

**Supplemental Table S8.** Odds ratios for severe COVID-19 (hospitalization or death) by outpatient treatment status, only considering outcomes that occur at least one day after initial positive SARS-CoV-2 test.

| <b>Comparisons (reference=second group listed)</b>   | <b>Unadjusted OR for severe COVID-19 (95%CI)</b> | <b>Multivariable* OR for severe COVID-19 (95%CI)</b> |
|------------------------------------------------------|--------------------------------------------------|------------------------------------------------------|
| <b>Primary analysis</b>                              |                                                  |                                                      |
| Any outpatient treatment vs. no outpatient treatment | 0.18 (0.08, 0.38)                                | 0.22 (0.10, 0.48)                                    |
| <b>Secondary analyses</b>                            |                                                  |                                                      |
| Nirmatrelvir/ritonavir vs. no outpatient treatment   | 0.11 (0.04, 0.31)                                | 0.15 (0.05, 0.43)                                    |
| Monoclonal antibodies vs. no outpatient treatment    | 0.41 (0.16, 1.10)                                | 0.41 (0.15, 1.11)                                    |
| Nirmatrelvir/ritonavir vs. all others                | 0.14 (0.05, 0.39)                                | 0.19 (0.06, 0.54)                                    |
| Monoclonal antibodies vs. all others                 | 0.83 (0.32, 2.18)                                | 0.67 (0.24, 1.83)                                    |
| Nirmatrelvir/ritonavir vs. monoclonal antibodies     | 0.26 (0.07, 1.00)                                | 0.46 (0.11, 1.97)                                    |

\*Adjusted for continuous age, continuous Charlson Comorbidity Index, continuous estimated glomerular filtration rate, and race.

CI, confidence interval; COVID-19, coronavirus disease 2019; OR, odds ratio; SARS-CoV-2, severe acute respiratory syndrome coronavirus 2.

**Supplemental Table S9.** Severe COVID-19 outcomes by outpatient treatment among SARD patients (n=704), only considering outcomes that occur at least one day after initial positive SARS-CoV-2 test to day 14.

| <b>Outcome</b>                             | <b>All Rheumatic Disease Patients with COVID-19 (n=704)</b> | <b>No outpatient treatment (n=278)</b> | <b>Any treatment (n=426)</b> | <b>Nirmatrelvir/ritonavir use (n=307)</b> | <b>Monoclonal antibody use (n=105)</b> |
|--------------------------------------------|-------------------------------------------------------------|----------------------------------------|------------------------------|-------------------------------------------|----------------------------------------|
| Hospitalization                            | 34 (4.8%)                                                   | 25 (9.0%)                              | 9 (2.1%)                     | 4 (1.3%)                                  | 5 (4.8%)                               |
| Death                                      | 1 (0.1%)                                                    | 1 (0.4%)                               | 0 (0.0%)                     | 0 (0.0%)                                  | 0 (0.0%)                               |
| Severe COVID-19 (hospitalization or death) | 34 (4.8%)                                                   | 25 (9.0%)                              | 9 (2.1%)                     | 4 (1.3%)                                  | 5 (4.8%)                               |

\*There were no severe COVID-19 outcomes among molnupiravir (n=5), remdesivir (n=3), or combination (n=6; 4 received nirmatrelvir/ritonavir and monoclonal antibodies and 2 received molnupiravir and monoclonal antibodies) users.

COVID-19, coronavirus disease 2019; SARD, systemic autoimmune rheumatic disease; SARS-CoV-2, severe acute respiratory syndrome coronavirus 2.

**Supplemental Table S10.** Odds ratios for severe COVID-19 (hospitalization or death) by outpatient treatment status, only considering outcomes that occur at least one day after initial positive SARS-CoV-2 test to day 14.

| <b>Comparisons (reference=second group listed)</b>   | <b>Unadjusted OR for severe COVID-19 (95%CI)</b> | <b>Multivariable* OR for severe COVID-19 (95%CI)</b> |
|------------------------------------------------------|--------------------------------------------------|------------------------------------------------------|
| <b>Primary analysis</b>                              |                                                  |                                                      |
| Any outpatient treatment vs. no outpatient treatment | 0.22 (0.10, 0.48)                                | 0.28 (0.12, 0.62)                                    |
| <b>Secondary analyses</b>                            |                                                  |                                                      |
| Nirmatrelvir/ritonavir vs. no outpatient treatment   | 0.13 (0.05, 0.39)                                | 0.18 (0.06, 0.55)                                    |
| Monoclonal antibodies vs. no outpatient treatment    | 0.51 (0.19, 1.36)                                | 0.51 (0.19, 1.42)                                    |
| Nirmatrelvir/ritonavir vs. all others                | 0.16 (0.06, 0.46)                                | 0.22 (0.08, 0.66)                                    |
| Monoclonal antibodies vs. all others                 | 0.98 (0.37, 2.60)                                | 0.82 (0.30, 2.25)                                    |
| Nirmatrelvir/ritonavir vs. monoclonal antibodies     | 0.26 (0.07, 1.00)                                | 0.46 (0.11, 1.97)                                    |

\*Adjusted for continuous age, continuous Charlson Comorbidity Index, continuous estimated glomerular filtration rate, and race.

CI, confidence interval; COVID-19, coronavirus disease 2019; OR, odds ratio; SARS-CoV-2, severe acute respiratory syndrome coronavirus 2.

**Supplemental Table S11.** Severe COVID-19 outcomes by outpatient treatment among SARD patients (n=704), eliminating outcomes adjudicated to be unrelated to COVID-19.

| Outcome                                    | All Rheumatic Disease Patients with COVID-19 (n=704) | No outpatient treatment (n=278) | Any treatment (n=426) | Nirmatrelvir/ritonavir use (n=307) | Monoclonal antibody use (n=105) |
|--------------------------------------------|------------------------------------------------------|---------------------------------|-----------------------|------------------------------------|---------------------------------|
| Hospitalization                            | 46 (6.5%)                                            | 39 (14.0%)                      | 7 (1.6%)              | 4 (1.3%)                           | 3 (2.9%)                        |
| Death                                      | 2 (0.3%)                                             | 1 (0.4%)                        | 1 (0.2%)              | 1 (0.3%)                           | 0 (0.0%)                        |
| Severe COVID-19 (hospitalization or death) | 46 (6.5%)                                            | 39 (14.0%)                      | 7 (1.6%)              | 4 (1.3%)                           | 3 (2.9%)                        |

\*There were no severe COVID-19 outcomes among molnupiravir (n=5), remdesivir (n=3), or combination (n=6; 4 received nirmatrelvir/ritonavir and monoclonal antibodies and 2 received molnupiravir and monoclonal antibodies) users.

COVID-19, coronavirus disease 2019; SARD, systemic autoimmune rheumatic disease; SARS-CoV-2, severe acute respiratory syndrome coronavirus 2.

**Supplemental Table S12.** Odds ratios for severe COVID-19 (hospitalization or death) by outpatient treatment status, eliminating outcomes adjudicated to be unrelated to COVID-19.

| Comparisons (reference=second group listed)          | Unadjusted OR for severe COVID-19 (95%CI) | Multivariable* OR for severe COVID-19 (95%CI) |
|------------------------------------------------------|-------------------------------------------|-----------------------------------------------|
| <b>Primary analysis</b>                              |                                           |                                               |
| Any outpatient treatment vs. no outpatient treatment | 0.10 (0.05, 0.23)                         | 0.13 (0.05, 0.29)                             |
| <b>Secondary analyses</b>                            |                                           |                                               |
| Nirmatrelvir/ritonavir vs. no outpatient treatment   | 0.08 (0.03, 0.23)                         | 0.12 (0.04, 0.34)                             |
| Monoclonal antibodies vs. no outpatient treatment    | 0.18 (0.05, 0.60)                         | 0.16 (0.05, 0.55)                             |
| Nirmatrelvir/ritonavir vs. all others                | 0.11 (0.04, 0.32)                         | 0.17 (0.06, 0.49)                             |
| Monoclonal antibodies vs. all others                 | 0.38 (0.12, 1.25)                         | 0.26 (0.08, 0.92)                             |
| Nirmatrelvir/ritonavir vs. monoclonal antibodies     | 0.45 (0.10, 2.04)                         | 0.93 (0.18, 4.97)                             |

\*Adjusted for continuous age, continuous Charlson Comorbidity Index, continuous estimated glomerular filtration rate, and race.

CI, confidence interval; COVID-19, coronavirus disease 2019; OR, odds ratio; SARS-CoV-2, severe acute respiratory syndrome coronavirus 2.

**Supplemental Table S13.** Baseline characteristics stratified by COVID-19 rebound among users of nirmatrelvir/ritonavir (n=311).

| <b>Characteristic</b>                          | <b>Nirmatrelvir/<br/>ritonavir use<br/>and<br/>documented<br/>rebound<br/>(n=24)</b> | <b>Nirmatrelvir/<br/>ritonavir use<br/>and no<br/>documented<br/>rebound<br/>(n=287)</b> |
|------------------------------------------------|--------------------------------------------------------------------------------------|------------------------------------------------------------------------------------------|
| <b>Demographics</b>                            |                                                                                      |                                                                                          |
| Mean age (SD), years                           | 54.29 (13.4)                                                                         | 57.32 (15.0)                                                                             |
| Female                                         | 20 (83.3%)                                                                           | 219 (76.3%)                                                                              |
| <b>Race</b>                                    |                                                                                      |                                                                                          |
| White                                          | 20 (83.3%)                                                                           | 242 (84.3%)                                                                              |
| Black or African American                      | 0 (0.0%)                                                                             | 15 (5.2%)                                                                                |
| Asian                                          | 2 (8.3%)                                                                             | 8 (2.8%)                                                                                 |
| Other (Two or more)                            | 2 (8.3%)                                                                             | 14 (4.9%)                                                                                |
| Unknown                                        | 0 (0.0%)                                                                             | 8 (2.8%)                                                                                 |
| Hispanic or Latinx ethnicity                   | 0 (0.0%)                                                                             | 4 (1.4%)                                                                                 |
| <b>Lifestyle</b>                               |                                                                                      |                                                                                          |
| Body mass index (mean, SD, kg/m <sup>2</sup> ) | 24.72 (7.3)                                                                          | 28.13 (7.4)                                                                              |
| <b>Categorical BMI</b>                         |                                                                                      |                                                                                          |
| <18.5 (underweight)                            | 0 (0.0%)                                                                             | 9 (3.1%)                                                                                 |
| 18.5 to <25 (normal)                           | 11 (45.8%)                                                                           | 94 (32.8%)                                                                               |
| 25 to <30 (overweight)                         | 8 (33.3%)                                                                            | 84 (29.3%)                                                                               |
| ≥30 (obese)                                    | 4 (16.7%)                                                                            | 97 (33.8%)                                                                               |
| Missing                                        | 1 (4.2%)                                                                             | 3 (1.1%)                                                                                 |
| <b>Smoking status</b>                          |                                                                                      |                                                                                          |
| Never                                          | 16 (66.7%)                                                                           | 189 (65.9%)                                                                              |
| Past                                           | 7 (29.2%)                                                                            | 86 (30.0%)                                                                               |
| Current                                        | 0 (0.0%)                                                                             | 9 (3.1%)                                                                                 |
| Unknown                                        | 1 (4.2%)                                                                             | 3 (1.1%)                                                                                 |
| <b>Comorbidities</b>                           |                                                                                      |                                                                                          |
| Median Charlson Comorbidity Index (IQR)        | 1 (1, 3)                                                                             | 1 (1, 2)                                                                                 |
| 0                                              | 4 (16.7%)                                                                            | 43 (15.0%)                                                                               |
| 1                                              | 9 (37.5%)                                                                            | 144 (50.2%)                                                                              |
| 2                                              | 4 (16.7%)                                                                            | 47 (16.4%)                                                                               |
| ≥3                                             | 7 (29.2%)                                                                            | 53 (18.5%)                                                                               |
| <b>Individual comorbidities</b>                |                                                                                      |                                                                                          |
| Hypertension                                   | 4 (16.7%)                                                                            | 99 (34.5%)                                                                               |
| Diabetes                                       | 3 (12.5%)                                                                            | 17 (5.9%)                                                                                |
| Coronary artery disease                        | 2 (8.3%)                                                                             | 22 (7.7%)                                                                                |
| Heart failure                                  | 0 (0.0%)                                                                             | 4 (1.4%)                                                                                 |
| Asthma                                         | 5 (20.8%)                                                                            | 39 (13.6%)                                                                               |
| Chronic obstructive pulmonary disease          | 0 (0.0%)                                                                             | 4 (1.4%)                                                                                 |
| Obstructive sleep apnea                        | 2 (8.3%)                                                                             | 26 (9.1%)                                                                                |
| Chronic kidney disease                         | 5 (20.8%)                                                                            | 23 (8.0%)                                                                                |
| Interstitial lung disease                      | 0 (0.0%)                                                                             | 9 (3.1%)                                                                                 |
| Malignancy excluding non-melanoma skin cancer  | 1 (4.2%)                                                                             | 34 (11.9%)                                                                               |
| Non-melanoma skin cancer                       | 0 (0.0%)                                                                             | 9 (3.1%)                                                                                 |
| <b>SARD diagnosis</b>                          |                                                                                      |                                                                                          |
| Rheumatoid arthritis                           | 10 (41.7%)                                                                           | 149 (51.9%)                                                                              |
| Psoriatic arthritis                            | 5 (20.8%)                                                                            | 57 (19.9%)                                                                               |

|                                                               |            |             |
|---------------------------------------------------------------|------------|-------------|
| Giant cell arteritis and/or polymyalgia rheumatic             | 0 (0.0%)   | 13 (4.5%)   |
| Systemic lupus erythematosus                                  | 5 (20.8%)  | 33 (11.5%)  |
| Sjogren's syndrome                                            | 2 (8.3%)   | 5 (1.7%)    |
| ANCA-associated vasculitis and other miscellaneous vasculitis | 0 (0.0%)   | 9 (3.1%)    |
| Systemic sclerosis                                            | 0 (0.0%)   | 4 (1.4%)    |
| Axial spondyloarthritis                                       | 1 (4.2%)   | 4 (1.4%)    |
| Mixed connective tissue disease                               | 0 (0.0%)   | 2 (0.7%)    |
| Antiphospholipid antibody syndrome                            | 0 (0.0%)   | 3 (1.1%)    |
| Behcet disease                                                | 1 (4.2%)   | 2 (0.7%)    |
| Idiopathic inflammatory myositis                              | 0 (0.0%)   | 0 (0.0%)    |
| Takayasu arteritis                                            | 0 (0.0%)   | 1 (0.4%)    |
| Juvenile idiopathic arthritis                                 | 0 (0.0%)   | 1 (0.4%)    |
| Multiple primary rheumatic diseases                           | 0 (0.0%)   | 4 (1.4%)    |
| <b>Immunomodulatory medications</b>                           |            |             |
| Oral glucocorticoid                                           | 0 (0.0%)   | 6 (2.1%)    |
| Conventional synthetic DMARDs                                 | 18 (75.0%) | 190 (66.2%) |
| Hydroxychloroquine                                            | 11 (45.8%) | 76 (26.5%)  |
| Hydroxychloroquine monotherapy                                | 6 (25.0%)  | 37 (12.9%)  |
| Methotrexate                                                  | 4 (16.7%)  | 102 (35.5%) |
| Mycophenolate mofetil/mycophenolic acid                       | 0 (0.0%)   | 14 (4.9%)   |
| Leflunomide                                                   | 2 (8.3%)   | 22 (7.7%)   |
| Azathioprine                                                  | 3 (12.5%)  | 6 (2.1%)    |
| Sulfasalazine                                                 | 0 (0.0%)   | 15 (5.2%)   |
| Apremilast                                                    | 0 (0.0%)   | 2 (0.7%)    |
| Cyclophosphamide                                              | 0 (0.0%)   | 4 (1.4%)    |
| Cyclosporine                                                  | 0 (0.0%)   | 6 (2.1%)    |
| Tacrolimus                                                    | 2 (8.3%)   | 8 (2.8%)    |
| Biologic DMARDs                                               | 8 (33.3%)  | 128 (44.6%) |
| Anti-CD20 monoclonal antibody                                 | 0 (0.0%)   | 15 (5.2%)   |
| TNF inhibitor                                                 | 6 (25.0%)  | 80 (27.9%)  |
| IL-6 receptor inhibitor                                       | 0 (0.0%)   | 11 (3.8%)   |
| B-cell activating factor inhibitor                            | 0 (0.0%)   | 1 (0.4%)    |
| IL-23 inhibitor                                               | 0 (0.0%)   | 1 (0.4%)    |
| IL-17 inhibitor                                               | 2 (8.3%)   | 11 (3.8%)   |
| IL-12/IL-23 inhibitor                                         | 0 (0.0%)   | 1 (0.4%)    |
| IL-1 inhibitor                                                | 0 (0.0%)   | 1 (0.4%)    |
| CTLA-4 immunoglobulin                                         | 0 (0.0%)   | 8 (2.8%)    |
| Targeted synthetic DMARD                                      |            |             |
| JAK inhibitor                                                 | 0 (0.0%)   | 8 (2.8%)    |
| <b>Previous COVID-19 immunity</b>                             |            |             |
| Vaccination status                                            |            |             |
| Unvaccinated                                                  | 0 (0.0%)   | 8 (2.8%)    |
| Partially vaccinated                                          | 0 (0.0%)   | 0 (0.0%)    |
| 2 doses mRNA or 1 dose J&J                                    | 3 (12.5%)  | 38 (13.2%)  |
| Additional doses                                              | 21 (87.5%) | 241 (84.0%) |
| Tixagevimab/cilgavimab use                                    | 0 (0.0%)   | 6 (2.1%)    |

|                             |          |          |
|-----------------------------|----------|----------|
| Previous COVID-19 infection | 0 (0.0%) | 8 (2.8%) |
|-----------------------------|----------|----------|

ANCA, antineutrophil cytoplasmic antibodies; COVID-19, coronavirus disease 2019; CTLA-4, cytotoxic T-lymphocyte-associated protein 4; DMARDs, disease-modifying antirheumatic drugs; eGFR, estimated glomerular filtration rate; IL, interleukin; IQR, interquartile range; SARD, systemic autoimmune rheumatic disease; SD, standard deviation; TNF, tumor necrosis factor.
